# Supplementary material
Source: Elsevier journal article supplement (https://comptes-rendus.academie-sciences.fr/physique/article/10.1016/j.crhy.2017.10.008/file/attach/mmc1.pdf)
Supplement: mmc1 [file mmc1.pdf]

# *La découverte de la radioactivité*

## The discovery of radioactivity

PierreRadvanyi<sup>a</sup>, JacquesVillain<sup>b</sup>

*a Institut de physique nucléaire d'Orsay, 15, rue Georges-Clemenceau, 91406 Orsay cedex, France*

*b Institut Laue-Langevin, 71, avenue des Martyrs, CS 20156, 38042, Grenoble cedex9, France*

### **r é s u m é**

La radioactivité de l'uranium a été découverte en 1896 par Henri Becquerel qui, partant d'une idée fautive, a progressivement réalisé ce qu'il était en train d'observer, informant régulièrement l'Académie des sciences des progrès qu'il faisait. Au cours des années qui ont suivi, il fut découvert que le thorium était également radioactif, et deux nouveaux éléments radioactifs, le polonium et le radium, furent mis en évidence par Pierre et Marie Curie, tandis qu'un troisième, l'actinium, était identifié par André Debierne. L'étude du pouvoir de pénétration et de l'effet des champs électriques et magnétiques permit aux scientifiques de démontrer la complexité de la radiation nucléaire, avec ses trois composantes  $\alpha$ ,  $\beta$  et  $\gamma$ . Les *Comptes rendus de l'Académie des sciences* permettent au lecteur de réaliser combien il fut difficile de comprendre la nature de la radioactivité, qui fut essentiellement élucidée par Ernest Rutherford et Frederick Soddy.

### **Abstract**

The radioactivity of uranium was discovered in 1896 by Henri Becquerel who, starting from a wrong idea, progressively realized what he was observing, regularly informing the French Academy of Sciences of the progress he was doing. In the next years, it was found that thorium was radioactive too, and two new radioactive elements, polonium and radium, were discovered by Pierre and Marie Curie, while a third one, actinium, was identified by André Debierne. The study of the penetrating power and of the effect of electric and magnetic fields allowed scientists to demonstrate the complexity of nuclear radiation with its three components  $\alpha$ ,  $\beta$ ,  $\gamma$ . The *Comptes rendus de l'Académie des sciences* allow the reader to see how difficult it was to understand the nature of radioactivity, which was essentially elucidated by Ernest Rutherford and Frederick Soddy.

## **1. La découverte d'Henri Becquerel : l'uranium émet spontanément un rayonnement**

Cinq ans avant la fin du dix-neuvième siècle, personne ne pensait que la matière pût émettre une radiation, à moins d'être chauffée ou soumise à une tension électrique élevée. La radiation la mieux comprise était la lumière, bien décrite par la théorie de Maxwell en l'absence de quantification. La nature des rayons cathodiques, découverts en 1869 par l'Allemand Johann Hittorf, était encore débattue. Quant à la radiation découverte par Röntgen en 1895, elle était particulièrement mystérieuse, et pour cette raison baptisée rayonnement X par son découvreur.

Pendant les années suivantes, un nouveau phénomène fut découvert : la radioactivité. Elle était la fille d'Henri Poincaré et des rayons X. Le mathématicien était intéressé par la physique et connaissait la langue allemande. Il avait reçu un exemplaire de l'article de

Röntgen, et le 20 janvier 1896 il fit un exposé sur les rayons X à l'Académie des Sciences. Il émit l'idée que ce rayonnement pourrait être dû à la fluorescence du tube de Crookes dans lequel on produisait les rayons cathodiques, et qu'il pourrait être une propriété générale des corps fluorescents. Parmi les académiciens présents se trouvait précisément un spécialiste de la fluorescence : Henri Becquerel, professeur au Muséum d'histoire naturelle. De retour en son Museum, il décida de faire des expériences sur un matériau fluorescent qu'il possédait, et qui se trouvait être le sulfate double de potassium et d'uranium.

La luminescence (fluorescence ou phosphorescence) est la propriété de certains matériaux d'absorber de la lumière et de réémettre une lumière de fréquence différente au bout d'un temps qui peut atteindre plusieurs heures, mais qui est bien plus court dans le cas du sulfate de potassium et d'uranium. La source de lumière la plus usuelle à cette époque était le soleil, et on va voir l'importance de ce détail.

Au cours des mois qui suivirent, Becquerel se rendit compte peu à peu (i) que son idée initiale était fautive ; (ii) qu'il était en train de faire une découverte majeure. Il rendait régulièrement compte de ses résultats à ses collègues de l'Académie des Sciences et nous pouvons suivre l'évolution de sa pensée dans les *Comptes rendus* [1].

A la mi-février, Becquerel déposa son sel d'uranium sur une plaque photographique enveloppée dans un papier noir très épais et exposa l'ensemble au soleil pendant plusieurs heures. Il observa que « Lorsqu'on développe ensuite la plaque photographique, on reconnaît que la silhouette de la substance phosphorescente apparaît en noir sur le cliché » et conclut que « la substance phosphorescente en question émet des radiations qui traversent le papier opaque à la lumière. »

Cette affirmation, soigneusement formulée, était correcte, mais il est vraisemblable qu'en février 1896 la plupart des collègues de Becquerel pensaient qu'il s'agissait d'une propriété générale. L'un d'eux écrivait [2] que « Les corps fluorescents émettent des radiations jouissant des propriétés des rayons X conformément à l'hypothèse de notre confrère M. Poincaré. ». Il utilisait le pluriel (les corps) et encore le pluriel (propriétés) alors que Becquerel avait la prudence de préciser quelles propriétés avaient été observées, et de parler de « la substance phosphorescente en question ».

L'étape suivante était de déterminer si la radiation était bien celle observée par Röntgen. Dans ce but, Becquerel étudia l'absorption du rayonnement émis par son sulfate de potassium et d'uranium, et s'aperçut qu'il pouvait traverser non seulement une feuille de papier noir épais, mais aussi une plaque d'aluminium ou une feuille mince de cuivre. Ce résultat fut annoncé le 2 mars ainsi qu'une observation inattendue liée à l'intermittence de sa source lumineuse : « Parmi les expériences » déclarait-il « quelques-unes avaient été préparées le mercredi 26 et le jeudi 27 février et, comme ces jours-là, le soleil ne s'est montré que d'une manière intermittente, j'avais conservé les expériences toutes préparées et rentré les châssis à l'obscurité dans le tiroir d'un meuble, en laissant en place les lamelles du sel d'uranium. Le soleil ne s'étant pas montré de nouveau les jours suivants, j'ai développé les plaques photographiques le 1er mars, en m'attendant à trouver des images très faibles. Les silhouettes apparurent, au contraire, avec une grande intensité. Je pensai aussitôt que l'action avait dû continuer à l'obscurité... »

Becquerel commençait à douter que le rayonnement qu'il découvrait fût une propriété générale des matériaux luminescents. Le 9 mars, il annonça [1c] qu'il avait cherché à détecter

une radiation que pourrait émettre la blende hexagonale ( $\alpha$  ZnS), qui est hautement phosphorescente, et que rien ne s'était produit. Toutefois, le titre de sa note, comme ceux des deux précédents, contient encore le mot « phosphorescente ». Deux semaines plus tard, ce mot avait disparu, et la nouvelle note [1d] était consacrée aux *rayonnements émis par les sels d'uranium*. En mai, Becquerel annonçait que l'uranium métallique rayonne encore plus intensément que ses sels. C'est, écrivait-il, "le premier exemple d'un métal présentant un phénomène de l'ordre d'une phosphorescence invisible. »[1f]. Ainsi, il n'avait pas encore abandonné l'idée qu'il observait un phénomène ressemblant à la phosphorescence. Cependant, en novembre, ses échantillons d'uranium, bien que maintenus dans l'obscurité depuis le 3 mars, émettaient toujours une radiation, qu'il appelait maintenant « rayons uraniques » [1g]. « la durée de l'émission de ces rayons uraniques est tout à fait en dehors des phénomènes ordinaires de phosphorescence, et l'on n'a pu reconnaître encore où l'uranium emprunte l'énergie qu'il émet avec une si longue persistance.. », écrivait-il.

Becquerel se demandait si ces radiations étaient vraiment des rayons X. Le 9 mars, il annonça [1c] que le rayonnement de l'uranium pouvait décharger un électroscope à feuilles d'or, comme le font les rayons X. L'effet fut étudié plus quantitativement dans les deux semaines suivantes, en interposant divers matériaux pour ralentir et absorber le rayonnement [1d]. En novembre, il concluait que « la décharge de corps électrisés par les gaz ayant été soumis à l'influence des rayons uraniques [...] vient ajouter une relation de plus entre les rayons X et les rayons uraniques qui, du point de vue de la réflexion et de la réfraction, apparaissent comme des phénomènes tout à fait différents. »

En avril 1897, Becquerel mit un terme à son étude des « rayons uraniques ». L'effet Zeeman, nouvellement découvert, lui semblait plus prometteur. Deux nouveaux venus, cependant, étaient attirés par les rayons uraniques : Pierre et Marie Curie.

Becquerel avait toujours utilisé la méthode photographique de mesure, parfois l'électroscope à feuille d'or, jamais la « méthode électrique », ce qui aurait permis des mesures plus quantitatives. Pierre et Marie Curie, ainsi qu'Ernest Rutherford utiliseront la méthode électrique.

## 2 . Ce n'est pas seulement l'uranium qui émet spontanément des radiations!

Pierre Curie, à 38 ans, était déjà un physicien bien connu. Pour ses travaux sur la piézoélectricité, il avait obtenu, avec son frère Jacques Curie, un prix de l'Académie des sciences. Il avait ensuite fait une étude systématique de la susceptibilité magnétique d'un certain nombre de matériaux en fonction de la température, et la célèbre loi de Curie témoigne du succès de ses recherches. En 1895, il avait épousé Maria Skłodowska, une étudiante polonaise de 8 ans plus jeune que lui. À cette époque, les étudiantes n'étaient pas acceptées dans les universités de la Pologne, qui faisait partie de l'empire russe. Pierre avait obtenu son doctorat et Marie sa « licence ». Après la naissance de leur première fille, Irène, elle cherchait un sujet de doctorat. Les rayons uraniques pourraient être une bonne idée, suggéra Pierre.[3] Grâce à lui, sa femme disposa d'instruments qui permettaient une mesure précise du rayonnement. « J'ai employé », expliqua-t-elle, un condensateur à plateaux » (*maintenant appelé chambre d'ionisation*); « l'un des plateaux était recouvert d'une couche uniforme d'uranium ou d'une autre substance finement pulvérisée. ... On établissait entre les plateaux une différence de potentiel de 100 volts. Le courant qui traversait le condensateur était mesuré ... au moyen d'un électromètre et d'un quartz piézoélectrique. » L'électromètre à quadrant qu'elle utilisait était une invention de Lord Kelvin, modifiée par Pierre Curie. Les propriétés du quartz piézoélectrique avaient été découvertes par Jacques et Pierre Curie.

« J'ai étudié la conductibilité de l'air sous l'influence des rayons de l'uranium », écrivait Marie Curie [3], « et j'ai cherché si des corps autres que les composés de l'uranium étaient susceptibles de rendre l'air conducteur de l'électricité. ». Un des problèmes était d'obtenir les échantillons, mais la jeune femme put s'assurer l'aide de collègues chevronnés. Le résultat fut brillant : ce n'est pas seulement l'uranium qui émet des radiations, et le thorium est également actif! "Il est à remarquer", écrit Marie, "que les deux éléments les plus actifs, l'uranium et le thorium, sont ceux qui possèdent le plus fort poids atomique". On sait en effet que les noyaux lourds sont instables parce que les forces nucléaires à courte portée ne peuvent plus compenser la répulsion de Coulomb entre les protons.

Au même moment, en Allemagne, Gerhard Carl Schmidt avait découvert que le thorium émettait des radiations [4]. La note de trois pages de Marie Curie aux *Comptes rendus* fut publiée le 12 avril et l'article de onze pages de Schmidt le 23 avril, mais il avait été envoyé le 24 mars.

L'étoile de Marie Curie ne faisait que commencer à briller. Elle avait remarqué un fait important: deux minerais d'uranium, la pechblende (oxyde d'uranium) et la chalcopite (phosphate de cuivre et d'uranium) étaient beaucoup plus actifs que l'uranium. " Ce fait est très remarquable et porte à croire que ces minéraux peuvent contenir un élément beaucoup plus actif que l'uranium." Sa déduction était correcte. Pierre Curie interrompit ses recherches sur le magnétisme et rejoignit sa femme dans l'étude de la radioactivité. Ils décidèrent d'utiliser une nouvelle méthode d'analyse chimique: elle était basée sur l'émission de radiations. «Nos recherches chimiques ont été constamment guidées par le contrôle de l'activité radiante des produits séparés à chaque opération», expliquaient-ils. L'élément recherché était concentré en fractions qui devenaient de plus en plus radioactives au fur et à mesure de la séparation. Le 18 juillet 1898, ils annoncèrent la découverte d'un nouvel élément [5], qu'ils proposèrent d'appeler *polonium*. Pour la première fois, le mot *radio-actif* apparaissait dans une publication scientifique, et les anciens «rayons uraniques» étaient maintenant appelés «rayons de Becquerel», puisque l'uranium n'est pas le seul élément qui les émet.

Le 19 décembre, Pierre et Marie Curie annoncèrent la découverte d'un autre élément très radioactif dans la pechblende [6]. L'aide d'un chimiste, Gustave Bémont, et d'un spectroscopiste, Eugène Demarçay, rendaient cette découverte incontestable. Le nouvel élément était chimiquement analogue au baryum, et donc assez difficile à séparer, mais la présence d'une raie spectroscopique inconnue témoignait de sa présence. Ses découvreurs l'appelèrent *radium*.

Pierre et Marie Curie n'excluaient pas la présence de nouveaux éléments radioactifs dans la pechblende, mais ils laissèrent à un collègue le soin de les chercher. En effet, dans une note du 16 octobre 1899, André Debierne annonçait la découverte d'un nouvel élément radioactif [8]. Cet élément fut appelé plus tard *actinium*.

### 2.1. *L'importance du radium*

La demi-vie du radium est de 1600 ans, ce qui est beaucoup plus court que la demi-vie de l'uranium ( $4,5 \cdot 10^9$  ans), de sorte que, pour un même poids, son rayonnement est beaucoup plus intense. Pour l'étude de la radioactivité, le radium était donc beaucoup plus pratique que l'uranium faiblement radioactif. Les rayons émis par le radium devenaient un outil

remarquable pour explorer la structure microscopique de la matière. Des applications médicales apparurent dès la fin de 1901. Cependant, le radium est également très rare et très cher. En effet, il y a 0,15 g de radium dans 1 tonne de pechblende.

Alors que l'uranium était le premier élément radioactif à être découvert, le radium était beaucoup plus populaire, car il s'agissait d'un matériau spontanément lumineux qui émettait une quantité incroyable de rayonnement. La popularité du radium est illustrée par un roman de Maurice Leblanc publié en 1919, *L'île aux trente cercueils*, où un rôle central est joué par une pierre "frissonnante de radium, d'où part inlassablement un bombardement d'atomes vivifiants et miraculeux".

La collaboration entre Pierre et Marie Curie fut exemplaire à bien des égards. Ils se complétaient. Pierre était rêveur et imaginatif, prêt à entreprendre plusieurs projets difficiles en même temps ou successivement. Marie était pleine d'énergie et de ténacité lorsqu'elle poursuivait le but qu'elle avait en tête.

## 2.2 . *La nature des rayonnements émis par les atomes radioactifs*

Que sont les rayons de Becquerel? La réponse vint de divers pays. La recherche sur la radioactivité devenait, en effet, internationale. De Nouvelle-Zélande, un jeune physicien très doué débarqua en Angleterre: Ernest Rutherford. Après une étude précise de l'absorption du rayonnement de l'uranium par une épaisseur croissante d'aluminium, il conclut que « ces expériences montrent que le rayonnement de l'uranium est complexe et qu'il y a au moins deux types distincts de radiation, l'une très facilement absorbée, qui sera appelé par commodité le rayonnement  $\alpha$ , et l'autre plus pénétrant, qui sera appelé le rayonnement  $\beta$  » [9]. Le rayonnement facilement absorbé est de nos jours encore appelé rayonnement  $\alpha$ . Le rayonnement pénétrant était complexe, comme on s'en rendit compte dans les années suivantes. Une idée naturelle était d'étudier l'effet d'un champ magnétique ou électrique, dont on savait qu'il déviait les rayons cathodiques. En fait, une partie des rayons émis par le radium était facilement déviée par un champ magnétique, comme il fut montré par Friedrich Oskar Giesel [10] en Allemagne, puis vérifié par Stefan Meyer et Egon von Schweidler [11] en Autriche et par Henri Becquerel [12] . En 1900, on savait que "le rayonnement du radium contient deux groupes de rayons bien distincts : les rayons déviés par un champ magnétique et les rayons non déviés dans un champ magnétique" [13]. Les rayons "déviés", aujourd'hui appelés rayons  $\beta$ , se révélèrent identiques aux rayons cathodiques, dont Jean Perrin et Joseph John Thomson avaient éclairci la nature dans la dernière décennie du XIXe siècle: c'étaient des électrons. Ainsi, si on classait les rayonnements selon leur «déviabilité», il y en avait deux catégories, et si on les classait en fonction de leur pouvoir de pénétration, il y avait aussi deux catégories. On se rendit compte un peu plus tard qu'il y en a en fait trois. Le problème était que (i) les champs magnétiques disponibles à ce moment-là ne déviaient pas de manière appréciable les rayons  $\alpha$ , et (ii) les rayons gamma, qui ont un pouvoir de pénétration élevé, n'étaient pas faciles à détecter.

Cependant, ils furent observés en 1900 par Paul Villard [14], qui rapporta des expériences dans lesquelles il comparait la pénétration dans le verre de rayons magnétiques déviés et de rayons non-déviés. Le verre (en fait des plaques photographiques) avait été enveloppé dans un papier noir épais qui éliminait les rayons  $\alpha$  . De son expérience, Villard conclut que «la partie non-déviée de l'émission du radium contient des radiations très pénétrantes». C'était l'acte de naissance des rayons gamma, que Villard appelait «rayons X émis par le radium»; le mot "rayons gamma" a été inventé en 1903 par Rutherford. Becquerel, au début, était

sceptique [15], mais reconnaissait que «si les observations de M. Villard sont justes, il faudrait chercher la raison du désaccord dans l'existence de rayons moins intenses et très pénétrants» (en fait de rayons moins ionisants).

Il fallut plus de six ans pour élucider la nature des rayons  $\alpha$  [16], dont le parcours dans l'air à pression normale est limité. Ernest Rutherford montra en 1902 [17] qu'ils peuvent être déviés par un très fort champ magnétique et qu'ils portent une charge positive. En 1903, des expériences de Pierre Curie et Albert Laborde [18] indiquèrent que les particules  $\alpha$  sont fortement ionisantes. Ernest Rutherford et Frederick Soddy conclurent que chaque succession de désintégrations d'atomes radioactifs devait finalement conduire à la formation d'atomes stables [19,20]. Les expériences réalisées à Londres par William Ramsay (le découvreur des gaz rares) et Frederick Soddy [21] montrèrent clairement que de l'hélium prenait naissance dans les sources de radium et d'«émanation» (radon). Enfin, la mesure du rapport  $e/m$  des particules  $\alpha$  indiqua que c'étaient des atomes d'hélium complètement ionisés.

### 2.3 . D'où vient l'énergie? La nature de la radioactivité

On apprend à l'école, de nos jours, qu'il y a environ 14 milliards d'années, l'Univers était très chaud et permettait la formation de nombreux éléments stables ou instables, parmi lesquels l'uranium et le thorium, qui sont tous deux instables, mais très faiblement instables. La période de U est de 4,5 milliards d'années et la période de Th est de 14 milliards d'années, de sorte qu'il subsiste encore de l'uranium et beaucoup de thorium. Il y a aussi le radium et le radon parce qu'ils sont constamment produits par l'uranium et le thorium (voir Fig. 1, Tableau 1 et Fig. 2).

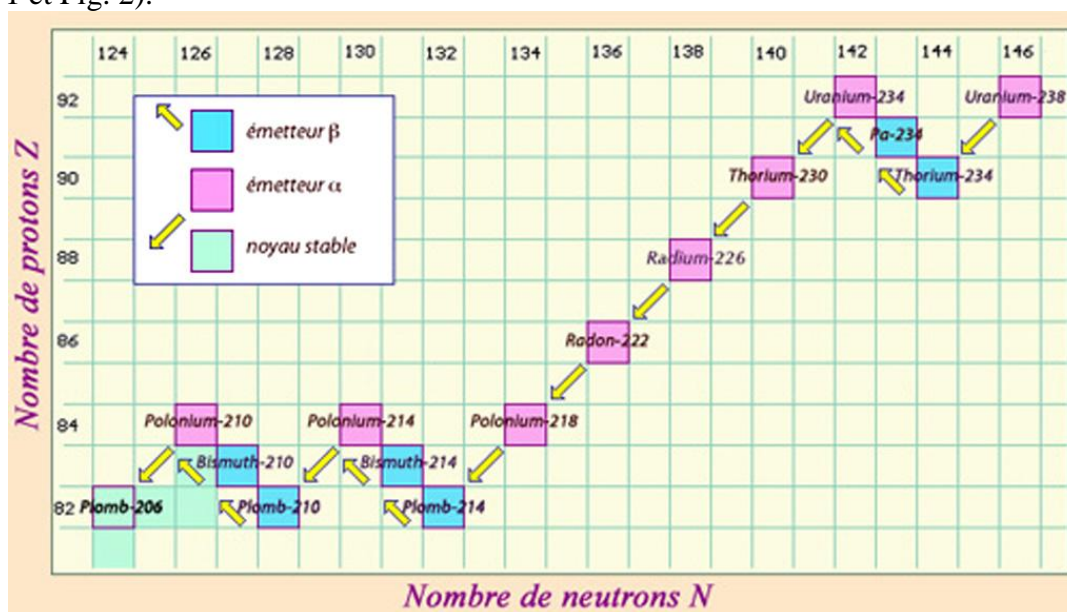

Fig. 1 . La famille radioactive de l'uranium-238, telle que nous la connaissons aujourd'hui. Les atomes ont des noyaux (Rutherford, 1911) composés de protons et de neutrons (Chadwick, 1932). (<http://www.laradioactivite.com/site/pages/desintegrationencascade.htm> ).

|                  | Période | Unité              | Emetteur |
|------------------|---------|--------------------|----------|
| Uranium-238      | 4,468   | Milliards d'années | alpha    |
| Thorium-234      | 24,10   | jours              | bêta -   |
| Protactinium-234 | 6,70    | heures             | bêta -   |
| Uranium-234      | 245 500 | ans                | alpha    |
| Thorium-230      | 75380   | ans                | alpha    |
| Radium-226       | 1 600   | ans                | alpha    |
| Radon-222        | 3,8235  | jours              | alpha    |
| Polonium-218     | 3,10    | minutes            | alpha    |
| Plomb-214        | 26,8    | minutes            | bêta -   |
| Bismuth-214      | 19,9    | minutes            | bêta -   |
| Polonium-214     | 164,3   | microsecondes      | alpha    |
| Plomb-210        | 22,3    | ans                | bêta     |
| Bismuth-210      | 5,015   | jours              | bêta     |
| Polonium-210     | 138,376 | jours              | alpha    |
| Plomb-206        | Stable  |                    |          |

Tableau 1 . Les périodes de l'uranium 238 et de ses descendants ( <http://www.laradioactivite.com/site/pages/desintegrationencascade.htm> ).

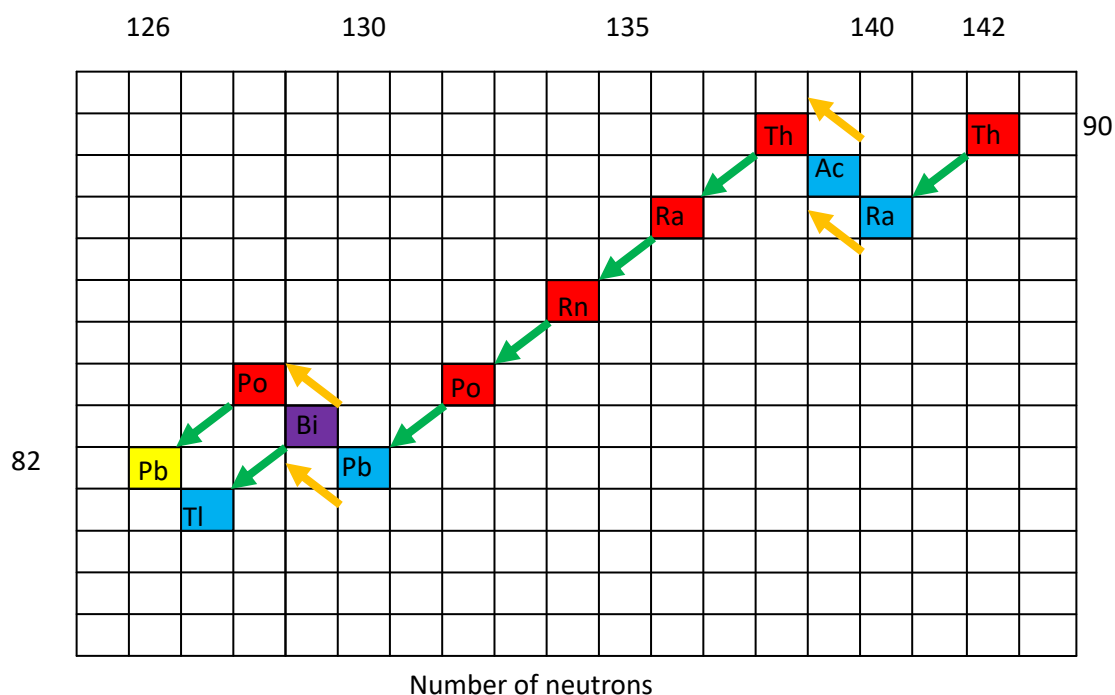

Fig. 2 . La famille radioactive du thorium, telle que nous la connaissons aujourd'hui. La direction verticale indique le nombre de protons. Les flèches vertes indiquent la désintégration alpha, les flèches jaunes indiquent la désintégration bêta. Les éléments en rouge sont des émetteurs alpha, ceux en bleu sont des émetteurs bêta; celui en violet signifie les deux, celui en jaune est stable. Rutherford et Soddy ont identifié la première partie de cette cascade en 1902-1903.

Rutherford et Soddy sont arrivés assez rapidement (en 1902) à une image de ce type, mais Pierre et Marie Curie hésitaient entre deux hypothèses: «on est obligé d'imaginer qu'il y a eu là autrefois un assez grand emmagasinement d'énergie sous une forme qui nous est inconnue, ou bien qu'il y a actuellement dans l'espace des sources d'énergie qui nous échappent et que ces corps sont capables d'utiliser » [22] . En janvier 1902, une note de Pierre et Marie Curie [23] montre qu'ils étaient sur la mauvaise piste. Ils écrivaient en effet que « chaque atome d'un corps radioactif fonctionne comme une source constante d'énergie » et que « des expériences de plusieurs années montrent que, pour l'uranium, le thorium, le radium, ... l'activité radiante ... ne varie pas avec le temps ». C'était une erreur: ils auraient plutôt dû donner une limite supérieure de la variation. D'après les valeurs des périodes que nous connaissons maintenant, il est facile de voir que la radioactivité de l'uranium et du thorium ne varie pas de façon directement mesurable. La période du radium est beaucoup plus courte (1600 ans), mais encore trop longue pour produire une diminution appréciable de l'activité en quelques mois. La loi de la décroissance radioactive ne peut être observée directement que pour un élément ayant une durée de vie beaucoup plus courte, à savoir le polonium (138 jours) ou le radon (3,8 jours); ces éléments, qui résultent de la désintégration de l'uranium ou du thorium, doivent être séparés chimiquement. L'effet des traitements chimiques (qu'on peut comprendre en regardant les figures 1 et 2) étaient un casse-tête pour Becquerel [24] : il observait «qu'après certains traitements [chimiques], des préparations d'uranium devenaient moins actives». Le traitement chimique incluait la séparation des précipités qui «pourraient devenir sensiblement plus radioactifs que l'uranium». Au bout de quelques mois, les composés d'uranium redeviennent aussi actifs qu'avant le traitement chimique.

En 1902, travaillant ensemble à Montréal sur les atomes radioactifs du thorium, Ernest Rutherford et Frederick Soddy montrèrent expérimentalement que la radioactivité est la transformation spontanée d'un élément en un autre avec émission de radiations [19,20]. Une succession de telles transformations forme une série radioactive.

Alors que les observations de Becquerel n'étaient que qualitatives, Rutherford et Soddy [19,20] énoncèrent des lois quantitatives à partir de leurs expériences sur le thorium. Ils ont établi que la désintégration radioactive est exponentielle, suivant la loi:

$$N=N_0e^{-\lambda t}$$

$N$  étant le nombre d'atomes radioactifs présents à l'instant  $t$  et  $N_0$  sa valeur à  $t=0$ . On a introduit la probabilité  $\lambda$  qu'a un atome de se désintégrer par unité de temps; la période ou la temps de vie  $T$  d'un atome radioactif est  $T= \ln 2/\lambda =0,693/\lambda$ . Si les atomes radioactifs résultant d'une telle désintégration sont également radioactifs, ils se décomposeront à leur tour avec leur propre période. De cette manière, nous avons toute une série de désintégrations successives. Même si Rutherford et Soddy ne connaissaient pas encore toute la séquence des désintégrations atomiques, les comportements exponentiels qu'ils avaient mis en évidence suggéraient que la radioactivité est une transformation irréversible de la matière. Ainsi, la première des deux possibilités envisagées par Pierre Curie était correcte: une énorme quantité d'énergie a été stockée il y a longtemps dans des atomes radioactifs. La deuxième hypothèse, à savoir qu'il existe des sources d'énergie dans l'espace, une sorte d'éther que ces atomes peuvent utiliser, n'est pas valide.

Il faut se rappeler qu'en 1903, les scientifiques ne connaissaient ni l'existence d'isotopes (découverte par Frederick Soddy en 1911), ni l'existence d'un noyau à l'intérieur de l'atome (démontrée par Ernest Rutherford en 1911), la radioactivité étant une propriété nucléaire. La présence d'électrons se déplaçant à l'intérieur de l'atome avait été démontrée par P. Zeeman et HA Lorentz (1897).



C'est à la fille de Pierre et Marie, Irène, et à leur gendre, Frédéric Joliot, que reviendra le mérite de découvrir que l'on peut créer des espèces radioactives (isotopes radioactifs) de tous les éléments chimiques [25].

### 3 . Les *Comptes rendus de l'Académie des sciences* : un cas unique

Les *Comptes rendus de l'Académie des sciences* permettent de suivre l'évolution de la découverte de Becquerel de semaine en semaine, ou au moins de mois en mois au cours de l'année 1896 [1]. Il informait l'Académie de ses découvertes, mais aussi de ses projets et de ses doutes. En 1900 encore, la controverse entre Becquerel et Villard [14, 15] donne un témoignage vivant de la difficulté d'atteindre la vérité en physique. Les collègues de Becquerel agissaient de la même manière<sup>1</sup>. Ils n'étaient pas particulièrement soucieux de publier des articles bien organisés, contrairement à Rutherford et Soddy, ou encore à Henri Poincaré.

#### Références

[1] Henri Becquerel (1896) *Comptes Rendus de l'Académie des Sciences* **122**

<http://gallica.bnf.fr/ark:/12148/cb343481087/date>

(a) H. Becquerel, Sur les radiations émises par phosphorescence, C. R. hebd. Séanc. Acad. Sci. Paris 122 (1896) 420–421;

(b) H. Becquerel, Sur les radiations invisibles émises par les corps phosphorescents, C. R. hebd. Séanc. Acad. Sci. Paris 122 (1896) 501–503 (2 Mars);

(c) H. Becquerel, Sur quelques propriétés nouvelles des radiations invisibles émises par divers corps phosphorescents, C. R. hebd. Séanc. Acad. Sci. Paris 122 (1896) 559–564 (9 Mars);

(d) H. Becquerel, Sur les radiations invisibles émises par les sels d'uranium, C. R. hebd. Séanc. Acad. Sci. Paris 122 (1896) 689–694 (23 March);

(e) H. Becquerel, Sur les propriétés différentes des radiations invisibles émises par les sels d'uranium, et du rayonnement de la paroi anticathodique d'un tube de Crookes, C. R. hebd. Séanc. Acad. Sci. Paris 122 (1896) 762–767 (30 Mars);

(f) H. Becquerel, Émission de radiations nouvelles par l'uranium métallique, C. R. hebd. Séanc. Acad. Sci. Paris 122 (1896) 1086 (18 Mai);

(g) H. Becquerel, Sur diverses propriétés des rayons uraniques, C. R. hebd. Séanc. Acad. Sci. Paris 123 (1896) 855–858, <http://gallica.bnf.fr/ark:/12148/cb343481087/date>.

[2] A. d'Arsonval, C. R. hebd. Séanc. Acad. Sci. Paris 122 (1896) 500 (same Internet address as [1]).

[3] M. Curie, Rayons émis par les composés de l'uranium et du thorium, C. R. hebd. Séanc. Acad. Sci. Paris 126 (1898) 1101–1103.

[4] G.C. Schmidt, Über die von den Thorverbindungen und einigen anderen Substanzen ausgehende Strahlung (On the radiation emitted by thorium compounds and some other substances), *Ann. Phys. Chem. (Berlin)* 65 (1898) 141–151.

[5] P. Curie, M. Curie, Sur une substance nouvelle radio-active, contenue dans la pechblende (On a new radioactive substance contained in pitchblende), C. R. hebd. Séanc. Acad. Sci. Paris 127 (1898) 175–178;

[http://www.academie-sciences.fr/pdf/dossiers/Curie/Curie\\_pdf/CR1898\\_p175\\_178.pdf](http://www.academie-sciences.fr/pdf/dossiers/Curie/Curie_pdf/CR1898_p175_178.pdf).

<sup>1</sup> Pierre et Marie Curie publiaient leurs découvertes dans les *Comptes rendus*, mais, n'étant pas, avant 1905, membres de l'Académie, avait moins de pages à leur disposition.

- [6] P. Curie, M. Curie, G. Bémont, Sur une nouvelle substance fortement radio-active contenue dans la pechblende (On a new, strongly radioactive substance contained in pitchblende), C. R. hebd. Séanc. Acad. Sci. Paris 127 (1898) 1215–1217 (same Internet address as [1]).
- [7] M. Curie, Sur le poids atomique du métal dans le chlorure de baryum radifère, C. R. hebd. Séanc. Acad. Sci. Paris 129 (1899) 760–762;  
M. Curie, Sur le poids atomique du métal dans le chlorure de baryum radifère, C. R. hebd. Séanc. Acad. Sci. Paris 131 (1900) 382–384.
- [8] A. Debierne, Sur une nouvelle matière radioactive (On a new radioactive material), C. R. hebd. Séanc. Acad. Sci. Paris 129 (1899) 593–595.
- [9] E. Rutherford, Uranium radiation and the electrical conduction produced by it, Philos. Mag. 47 (1899) 109–163.
- [10] F.O. Giesel, Ueber die Ablenkbarkeit der Becquerelstrahlen im magnetischen Felde, Ann. Phys. (Berlin) 305 (1899) 834–836.
- [11] S. Meyer, Egon von Schweidler, Notiz über das Verhalten von Radium im magnetischen Felde, Anz. Akad. Wiss. Wien Math.-Nat.wiss. Kl. 36 (1899) 323–324,  
<https://www.biodiversitylibrary.org/item/30038#page/353/mode/1up>;  
See also S. Meyer, E. von Schweidler, Phys. Z. 1 (1899) 113.
- [12] H. Becquerel, Influence d'un champ magnétique sur le rayonnement des corps radio-actifs, C. R. hebd. Séanc. Acad. Sci. Paris 129 (1899) 996–1001.
- [13] P. Curie, M. Curie, Sur la charge électrique des rayons déviables du radium, C. R. hebd. Séanc. Acad. Sci. Paris 130 (1900) 647–650.
- [14] P. Villard, Sur le rayonnement du radium (On the radiation of radium), C. R. hebd. Séanc. Acad. Sci. Paris 130 (1900) 1010–1012, 1178–1179.
- [15] H. Becquerel, Sur la transparence de l'aluminium pour le rayonnement du radium, C. R. hebd. Séanc. Acad. Sci. Paris 130 (1900) 1154–1157.
- [16] E. Rutherford, Nobel Lecture, Stockholm, 11 December 1908.
- [17] E. Rutherford, Die magnetische und elektrische Ablenkung der leicht absorbierbaren Radiumstrahlen, Phys. Z. 4 (1902–1903) 235.
- [18] P. Curie, A. Laborde, Sur la chaleur dégagée spontanément par les sels de radium, C. R. hebd. Séanc. Acad. Sci. Paris 136 (1903) 673–675.
- [19] E. Rutherford, F. Soddy, The cause and nature of radioactivity – Part I, Philos. Mag. 4 (1902) 370–396;  
E. Rutherford, F. Soddy, The cause and nature of radioactivity – Part II, Philos. Mag. 4 (1902) 582.
- [20] E. Rutherford, F. Soddy, Radioactive change, Philos. Mag. 5 (1903) 576.
- [21] W. Ramsay, F. Soddy, Experiments in radioactivity, and the production of helium from radium, Proc. R. Soc. 72 (1903) 204–207;  
W. Ramsay, F. Soddy, Experiments in radioactivity, and the production of helium from radium, Nature 68 (1903) 354–355.
- [22] P. Curie, Notice sur les travaux scientifiques, Gauthier-Villars, Paris, 1902,  
[http://www.academie-sciences.fr/pdf/dossiers/Curie/Curie\\_pdf/Curie\\_oeuvre.pdf](http://www.academie-sciences.fr/pdf/dossiers/Curie/Curie_pdf/Curie_oeuvre.pdf).
- [23] P. Curie, M. Curie, Sur les corps radioactifs (On radioactive materials), C. R. hebd. Séanc. Acad. Sci. Paris 134 (1902) 85–87.
- [24] H. Becquerel, Sur la radioactivité de l'uranium, C. R. hebd. Séanc. Acad. Sci. Paris 133 (1901) 977–980.
- [25] I. Curie, F. Joliot, Un nouveau type de radioactivité, C. R. hebd. Séanc. Acad. Sci. Paris 198 (1934) 254;  
I. Curie, F. Joliot, Séparation chimique des nouveaux radioéléments émetteurs d'électrons positifs, C. R. hebd. Séanc. Acad. Sci. Paris 198 (1934) 559.
